# Supplementary material for: Systemic overexpression of SQSTM1/p62 accelerates disease onset in a SOD1H46R-expressing ALS mouse model
Source: PubMed Central journal article supplement (PMC5975400; doi:10.1186/s13041-018-0373-8), 2018-05-29

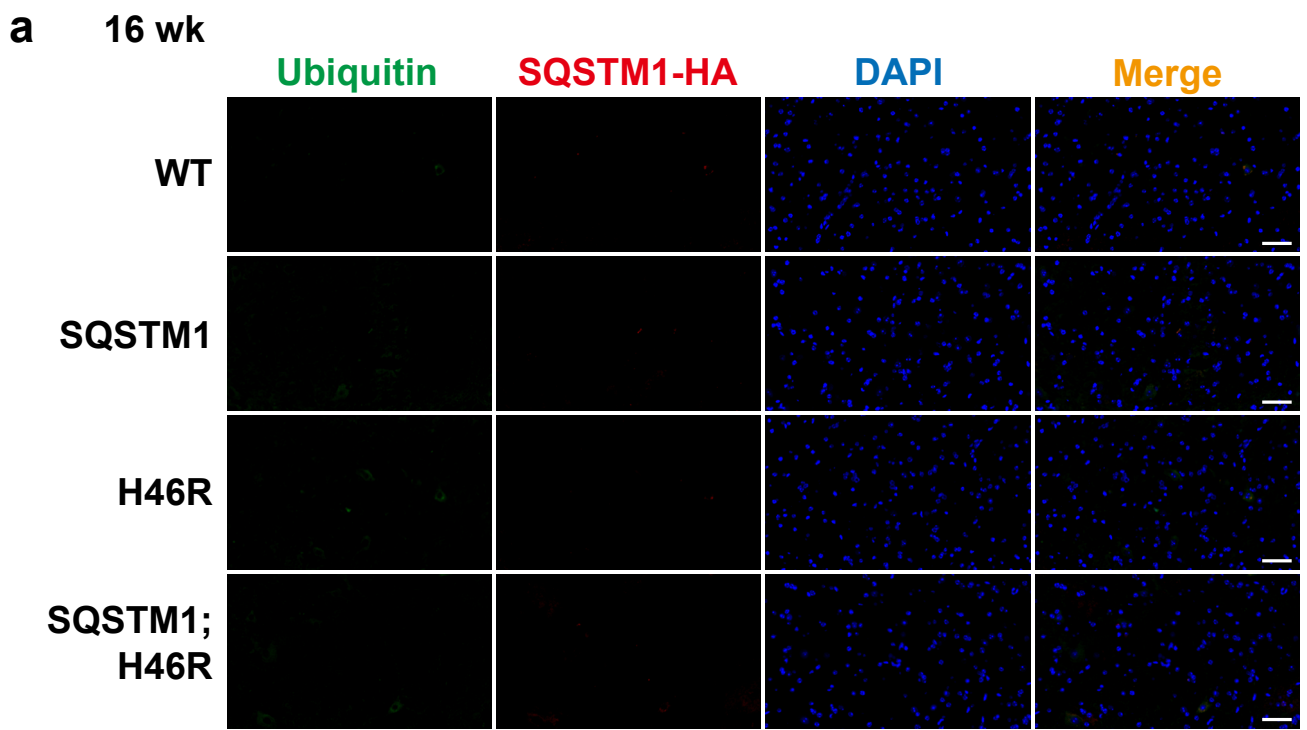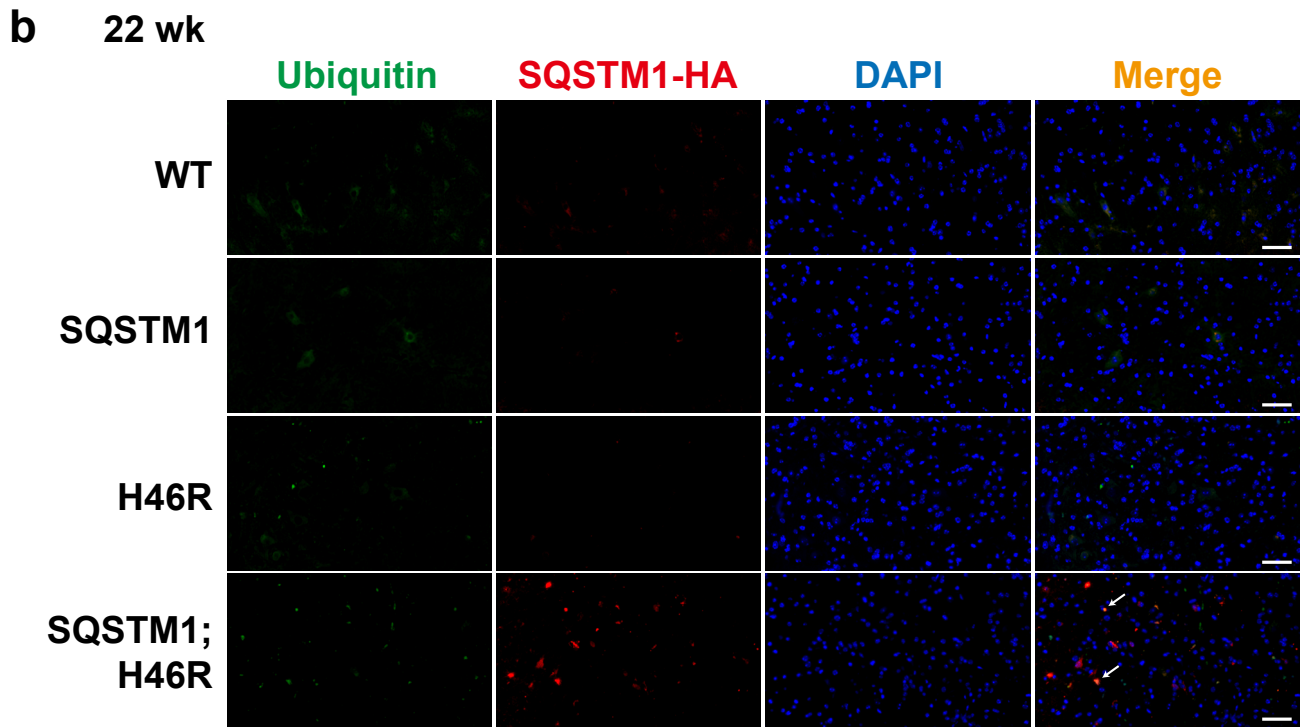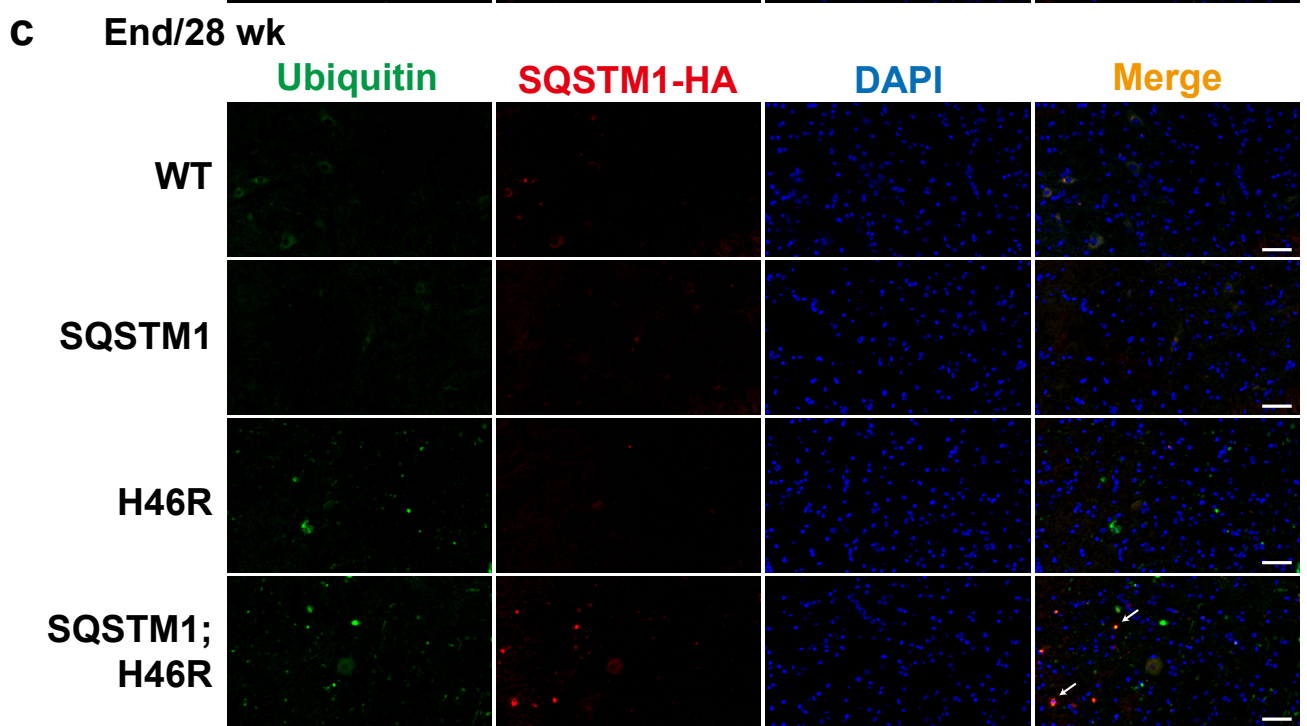

Supplement: 13041_2018_373_MOESM3_ESM.pdf [file 13041_2018_373_MOESM3_ESM.pdf]
